# Supplementary material for: Genetic variation in heat tolerance-related traits in a population of wheat multiple synthetic derivatives
Source: PubMed Central journal article supplement — Breed Sci. 2017 Dec 1;67(5):483–92. doi: 10.1270/jsbbs.17048 (PMC5790045; doi:10.1270/jsbbs.17048), 2017-12-01
Supplement: 67_17048_1.pdf [file 67_17048_1.pdf]

**Supplemental Table 1.** Morphological, phenological, physiological, yield, and yield component traits of ‘Norin 61’ (N61) and the Sudanese cultivars ‘Goumria’ and ‘Imam’ evaluated for heat stress tolerance at Dongola (DON), Hudeiba (HUD), Wad Medani with optimum sowing (MED/OS), and Wad Medani with late sowing (MED/LS)

| Trait            | DON   |         |      | HUD   |         |       | MED/OS |         |       | MED/LS |         |       |
|------------------|-------|---------|------|-------|---------|-------|--------|---------|-------|--------|---------|-------|
|                  | N61   | Goumria | Imam | N61   | Goumria | Imam  | N61    | Goumria | Imam  | N61    | Goumria | Imam  |
| DH               | 72    | 75      | 78   | 61    | 63      | 73    | 64     | 63      | 73    | 62     | 65      | 71    |
| DM               | 106   | 109     | 109  | 103   | 107     | 108   | 101    | 104     | 107   | 92     | 97      | 102   |
| GFD              | 33    | 34      | 30   | 42    | 39      | 35    | 37     | 40      | 34    | 30     | 32      | 31    |
| PH               | 97    | 83      | 89   | 69    | 64      | 75    | 84     | 74      | 86    | 79     | 70      | 83    |
| PL               | 34    | 32      | 32   | 13    | 8       | 12    | 28     | 28      | 34    | 26     | 25      | 28    |
| CT               | 32    | 22      | 21   | 30    | 30      | 30    | 17     | 17      | 23    | 25     | 25      | 27    |
| SPAD             | 43    | 38      | 40   | 51    | 51      | 52    | 50     | 50      | 51    | 50     | 51      | 48    |
| NDVI             | 0.71  | 0.73    | 0.71 | 0.63  | 0.55    | 0.62  | 0.55   | 0.58    | 0.59  | 0.69   | 0.67    | 0.73  |
| KS               | 23    | 24      | 21   | 45    | 54      | 45    | 56     | 55      | 55    | 54     | 50      | 48    |
| TKW              | 33    | 33      | 32   | 27    | 31      | 33    | 30     | 32      | 25    | 26     | 32      | 25    |
| Gm <sup>-2</sup> | 10965 | 10532   | 9787 | 10357 | 11531   | 11284 | 27181  | 21502   | 21335 | 21283  | 23142   | 20893 |
| GY               | 784   | 683     | 614  | 383   | 555     | 514   | 823    | 784     | 685   | 703    | 413     | 555   |
| BIO              | 2366  | 2459    | 2016 | 1279  | 1434    | 1457  | 2038   | 2109    | 2109  | 1089   | 1428    | 2244  |
| HI               | 33    | 30      | 31   | 31    | 40      | 35    | 40     | 39      | 32    | 39     | 31      | 24    |

DH, days to heading; DM, days to maturity; GFD, grain filling duration (days); PH, plant height (cm); PL, peduncle length (cm); CT, canopy temperature (°C); SPAD, chlorophyll content (SPAD units); NDVI, normalized difference vegetation index; KS, kernel number per spike; TKW, thousand-kernel weight (g); Gm<sup>-2</sup>, grain number per m<sup>2</sup>; GY, grain yield (g m<sup>-2</sup>), BIO, biomass (g m<sup>-2</sup>); HI, harvest index (%).

**Supplemental Table 2.** The effect of genotype (G), environment (E), and genotype–environment interaction (G×E) on morphological, phenological, physiological, yield, and yield component traits of the MSD lines, ‘Norin 61’ (N61), and the Sudanese cultivars ‘Goumria’ and ‘Imam’ evaluated for heat stress tolerance at Dongola (DON), Hudeiba (HUD), Wad Medani with optimum sowing (MED/OS), and Wad Medani with late sowing (MED/LS) in Sudan

| Trait            | DON      | HUD         | MED/OS       | MED/LS    | Combined analysis |             |
|------------------|----------|-------------|--------------|-----------|-------------------|-------------|
|                  | G        | G           | G            | G         | E                 | G×E         |
| DH               | 93.15*** | 71.94***    | 318.50***    | 24.38**   | ***               | 138.36***   |
| DM               | 92.85*** | 47.81***    | 119.96***    | NS        | ***               | 799.93***   |
| GFD              | NS       | 62.52***    | 64.83***     | NS        | ***               | 228.63***   |
| PH               | 146.79*  | 95.08*      | 91.59***     | 86.56***  | ***               | 565.86***   |
| PL               | 30.07*   | 20.59**     | 36.21***     | 17.86***  | ***               | 82.20***    |
| CT               | NS       | 2.02*       | 17.84*       | NS        | ***               | 103.26***   |
| SPAD             | 13.74*   | 29.41*      | 16.00**      | 11.77*    | ***               | 221.91***   |
| NDVI             | NS       | NS          | 0.0154***    | 0.0028*   | ***               | 0.0248***   |
| KS               | 20.41**  | 195.67***   | 151.25***    | 137.47*   | ***               | 407.36***   |
| TKW              | 30.31**  | 83.43***    | NS           | NS        | ***               | 289.96***   |
| Gm <sup>-2</sup> | NS       | 17728694*** | 136882698*** | 44834708* | ***               | 49961421*** |
| GY               | NS       | 34838.94**  | 73552.02**   | NS        | ***               | 112179.5*** |
| BIO              | NS       | 142111.7*   | 587.59*      | NS        | ***               | 510362.3*** |
| HI               | NS       | 134.42*     | 167.13***    | NS        | ***               | 384.08***   |

DH, days to heading; DM, days to maturity; GFD, grain filling duration (days); PH, plant height (cm); PL, peduncle length (cm); CT, canopy temperature (°C); SPAD, chlorophyll content (SPAD units); NDVI, normalized difference vegetation index; KS, kernel number per spike; TKW, thousand-kernel weight (g); Gm<sup>-2</sup>, grain number per m<sup>2</sup>; GY, grain yield (g m<sup>-2</sup>), BIO, biomass (g m<sup>-2</sup>); HI, harvest index (%).

**Supplemental Table 3.** Heat tolerance efficiency (HTE), morphological, phenological, physiological, yield, and yield component traits of 13 heat-tolerant MSD lines and their parent ‘Norin 61’ at Wad Medani with late sowing (MED/LS) and their combined yield at Dongola, Wad Medani with optimum sowing, Hudeiba, and MED/LS

| Line       | Cross name      | DH        | DM        | GFD       | PL        | CT        | SPAD      | NDVI        | KS        | TKW       | Gm <sup>-2</sup> | BIO         | GY <sup>a</sup> | GY <sup>b</sup> | HI        | HTE       |
|------------|-----------------|-----------|-----------|-----------|-----------|-----------|-----------|-------------|-----------|-----------|------------------|-------------|-----------------|-----------------|-----------|-----------|
| MSD006     | N61/Syn65//*N61 | 60        | 94        | 34        | 29        | 26        | 51        | 0.68        | 48        | 32        | 25200            | 2300        | 743             | 478             | 32        | 118       |
| MSD054     | N61/Syn26//*N61 | 61        | 96        | 35        | 24        | 26        | 50        | 0.66        | 48        | 28        | <b>31440</b>     | 1900        | 705             | 614             | 38        | 125       |
| MSD084     | N61/Syn30//*N61 | 58        | 92        | 32        | 30        | 27        | 48        | 0.62        | 52        | 28        | 14983            | 2150        | 746             | 670             | 34        | 109       |
| MSD108     | N61/Syn45//*N61 | 60        | 100       | 38        | 24        | 23        | 46        | 0.72        | 44        | 35        | <b>10418</b>     | 2225        | 639             | 535             | 28        | 107       |
| MSD186     | N61/Syn30//*N61 | 62        | 98        | 35        | 30        | 27        | 51        | 0.73        | <b>31</b> | 32        | <b>11500</b>     | 2475        | 759             | 608             | 31        | 148       |
| MSD208     | N61/Syn26//*N61 | 61        | 92        | 31        | 26        | 22        | 52        | 0.67        | 41        | 29        | 16267            | 2175        | 891             | 766             | 41        | 124       |
| MSD265     | N61/Syn44//*N61 | 59        | 90        | 30        | <b>31</b> | 28        | 51        | 0.64        | <b>28</b> | 33        | <b>10625</b>     | 2200        | 712             | 590             | 33        | 127       |
| MSD296     | N61/Syn32//*N61 | 59        | 94        | 35        | <b>33</b> | 27        | <b>44</b> | 0.69        | 52        | 29        | 21580            | 2550        | 758             | 538             | 29        | 126       |
| MSD303     | N61/Syn68//*N61 | 57        | 91        | 33        | 28        | 26        | <b>44</b> | <b>0.54</b> | 40        | 29        | 18842            | 1875        | 562             | 475             | 30        | 122       |
| MSD345     | N61/Syn48//*N61 | 65        | 98        | 35        | 24        | 27        | 54        | 0.69        | 47        | 32        | 17267            | 2275        | 629             | 504             | 28        | 110       |
| MSD360     | N61/Syn57//*N61 | 59        | 93        | 34        | 28        | 30        | 53        | <b>0.89</b> | 40        | 32        | 21175            | 2375        | 763             | 588             | 32        | 115       |
| MSD367     | N61/Syn57//*N61 | 61        | 100       | 37        | <b>34</b> | 26        | 49        | 0.69        | 68        | 25        | 21080            | 2575        | 644             | 577             | 25        | 115       |
| MSD453     | N61/Syn50//*N61 | 58        | 90        | 34        | 29        | 24        | 49        | 0.65        | 37        | 31        | 12467            | 2375        | 827             | 660             | 34        | 117       |
| Norin 61   |                 | 62        | 92        | 30        | 26        | 25        | 50        | 0.69        | 54        | 25        | 21283            | 1809        | 703             | 659             | 39        | 90        |
| Grand mean |                 | <b>63</b> | <b>96</b> | <b>33</b> | <b>27</b> | <b>26</b> | <b>49</b> | <b>0.69</b> | <b>40</b> | <b>26</b> | <b>15363</b>     | <b>1842</b> | <b>417</b>      | <b>396</b>      | <b>23</b> | <b>62</b> |

DH, days to heading; DM, days to maturity; GFD, grain filling duration (days); PL, peduncle length (cm); CT, canopy temperature (°C); SPAD, chlorophyll content (SPAD units); NDVI, normalized difference vegetation index; KS, kernel number per spike; TKW, thousand-kernel weight (g); Gm<sup>-2</sup>, grain number per m<sup>2</sup>; BIO, biomass (g m<sup>-2</sup>); GY<sup>a</sup>, grain yield (g m<sup>-2</sup>) at MED/LS; GY<sup>b</sup>, combined grain yield combine in all environments (g m<sup>-2</sup>); HI, harvest index (%).

**Supplemental Table 4.** Morphological, phenological, physiological, yield, and yield component traits of the 29 high-yielding MSD lines and the parent ‘Norin 61’ at Hudeiba, and their combined yield evaluated at Dongola, Wad Medani with optimum sowing, Wad Medani late with sowing and Hudieba

| Line   | Cross name      | DH        | DM        | GFD       | PL        | CT        | SPAD | NDVI | KS        | TKW       | Gm <sup>-2</sup> | BIO         | GY <sup>a</sup> | HI        | GY <sup>b</sup> |
|--------|-----------------|-----------|-----------|-----------|-----------|-----------|------|------|-----------|-----------|------------------|-------------|-----------------|-----------|-----------------|
| MSD044 | N61/Syn71//*N61 | 63        | 105       | 43        | 12        | 33        | 52   | 0.62 | 53        | 27        | 14826            | 1688        | 749             | 44        | 783             |
| MSD132 | N61/Syn34//*N61 | 62        | 104       | 42        | 18        | 28        | 50   | 0.80 | 40        | 28        | 10787            | 1771        | 722             | 41        | 693             |
| MSD136 | N61/Syn31//*N61 | 69        | 104       | 35        | 17        | 30        | 51   | 0.57 | 47        | <b>34</b> | 4795             | 1595        | 635             | 40        | 632             |
| MS140  | N61/Syn68//*N61 | 67        | 104       | 38        | 10        | 31        | 54   | 0.60 | 46        | <b>35</b> | 11124            | 1852        | 676             | 36        | 630             |
| MSD157 | N61/Syn40//*N61 | 66        | 104       | 38        | 12        | <b>26</b> | 51   | 0.78 | 45        | 25        | <b>15788</b>     | <b>2114</b> | 685             | 32        | 649             |
| MSD163 | N61/Syn31//*N61 | 59        | 104       | 45        | <b>19</b> | 30        | 55   | 0.67 | 39        | <b>36</b> | 13132            | <b>2174</b> | 752             | 35        | 796             |
| MSD166 | N61/Syn39//*N61 | 66        | 108       | 42        | 17        | <b>24</b> | 53   | 0.73 | 42        | <b>34</b> | 8915             | 1445        | 636             | 44        | 671             |
| MSD187 | N61/Syn68//*N61 | 66        | <b>97</b> | 32        | 9         | 30        | 56   | 0.63 | 31        | <b>39</b> | 7881             | 1652        | 701             | 42        | 562             |
| MSD195 | N61/Syn27//*N61 | 60        | 118       | <b>58</b> | 16        | 28        | 54   | 0.79 | 50        | 32        | 12751            | 1215        | 666             | <b>55</b> | 556             |
| MSD208 | N61/Syn26//*N61 | 60        | 104       | 44        | 14        | 28        | 53   | 0.74 | 45        | 28        | 11148            | 1224        | 658             | <b>54</b> | 766             |
| MSD215 | N61/Syn68//*N61 | <b>56</b> | 116       | <b>61</b> | <b>19</b> | 28        | 51   | 0.63 | 49        | 27        | 10293            | 1694        | 675             | 40        | 624             |
| MSD225 | N61/Syn48//*N61 | 68        | 104       | 36        | 21        | 30        | 53   | 0.76 | 43        | 29        | 12840            | <b>2064</b> | 785             | 38        | 587             |
| MSD267 | N61/Syn42//*N61 | 68        | 107       | 40        | 16        | 29        | 55   | 0.62 | 42        | <b>34</b> | 10192            | <b>1871</b> | 771             | 41        | 662             |
| MSD278 | N61/Syn62//*N61 | 61        | 104       | 43        | 11        | 27        | 53   | 0.66 | 46        | <b>34</b> | 14167            | <b>1878</b> | 682             | 36        | 564             |
| MSD289 | N61/Syn30//*N61 | 61        | 106       | 45        | 10        | 28        | 44   | 0.56 | 26        | <b>43</b> | 8190             | 974         | 679             | <b>70</b> | 463             |
| MSD300 | N61/Syn35//*N61 | 62        | 104       | 42        | 17        | 27        | 51   | 0.80 | 38        | <b>33</b> | 14036            | <b>1967</b> | 737             | 37        | 657             |
| MSD304 | N61/Syn62//*N61 | 67        | 103       | 36        | <b>19</b> | <b>26</b> | 55   | 0.70 | 45        | <b>36</b> | <b>16413</b>     | 881         | 708             | <b>80</b> | 600             |
| MSD307 | N61/Syn68//*N61 | 59        | 104       | 45        | 16        | 31        | 54   | 0.60 | 43        | 26        | 6474             | 1047        | 636             | <b>61</b> | 572             |
| MSD320 | N61/Syn58//*N61 | 66        | 104       | 38        | 17        | 28        | 52   | 0.68 | 39        | 31        | 8166             | 1775        | 744             | 42        | 602             |
| MSD326 | N61/Syn62//*N61 | 67        | 108       | 41        | 12        | 30        | 55   | 0.62 | 0         | 19        | <b>23874</b>     | 1804        | 785             | 44        | 699             |
| MSD367 | N61/Syn57//*N61 | 64        | <b>97</b> | 34        | <b>20</b> | 31        | 50   | 0.59 | 35        | <b>33</b> | 8775             | 1820        | 641             | 35        | 577             |
| MSD368 | N61/Syn48//*N61 | 63        | 106       | 43        | 11        | 29        | 52   | 0.66 | 50        | 29        | 13673            | <b>2221</b> | 888             | 40        | 680             |
| MSD377 | N61/Syn27//*N61 | 63        | 108       | 45        | <b>21</b> | <b>25</b> | 53   | 0.78 | 48        | 34        | 10101            | <b>1908</b> | 638             | 33        | 582             |
| MSD410 | N61/Syn27//*N61 | 60        | 104       | 45        | 16        | 32        | 49   | 0.64 | <b>59</b> | 29        | <b>17093</b>     | <b>2228</b> | 916             | 41        | 640             |
| MSD413 | N61/Syn48//*N61 | 68        | 102       | 35        | 16        | 31        | 57   | 0.64 | 43        | 32        | 10325            | <b>2166</b> | 950             | 44        | 663             |
| MSD434 | N61/Syn52//*N61 | 68        | 112       | 44        | 12        | 28        | 52   | 0.60 | 45        | 26        | 12808            | <b>2027</b> | 634             | 31        | 587             |

|            |                 |           |            |           |           |           |           |      |           |           |              |             |            |           |            |
|------------|-----------------|-----------|------------|-----------|-----------|-----------|-----------|------|-----------|-----------|--------------|-------------|------------|-----------|------------|
| MSD491     | N61/Syn37//*N61 | 65        | 108        | 43        | 14        | 29        | 38        | 0.80 | 41        | <b>33</b> | 10675        | <b>1964</b> | 772        | 39        | 582        |
| MSD499     | N61/Syn66//*N61 | 76        | 108        | 32        | 9         | 29        | 55        | 0.54 | 49        | 31        | <b>15746</b> | 1277        | 818        | <b>64</b> | 482        |
| MSD500     | N61/Syn34//*N61 | 60        | 103        | 43        | <b>21</b> | 33        | 57        | 0.60 | 31        | 32        | 5947         | 1327        | 422        | 32        | 478        |
| Norin 61   |                 | 61        | 103        | 42        | 13        | 30        | 50        | 0.63 | 41        | 26        | 10357        | 1279        | 383        | 30        | 659        |
| Grand mean |                 | <b>66</b> | <b>107</b> | <b>40</b> | <b>15</b> | <b>30</b> | <b>51</b> | 0.60 | <b>37</b> | <b>26</b> | <b>8458</b>  | <b>1283</b> | <b>429</b> | <b>32</b> | <b>396</b> |

DH, days to heading; DM, days to maturity; GFD, grain filling duration (days); PL, peduncle length (cm); CT, canopy temperature (°C); SPAD, chlorophyll content (SPAD units); NDVI, normalized difference vegetation index; KS, kernel number per spike; TKW, thousand-kernel weight (g); Gm<sup>-2</sup>, grain number per m<sup>2</sup>; BIO, biomass (g m<sup>-2</sup>); GY<sup>a</sup>, grain yield (g m<sup>-2</sup>) at HUD; HI, harvest index (%); GY<sup>b</sup>, grain yield combine for all environments (g m<sup>-2</sup>). Bold letters indicate values that are significantly difference than those of Norin 61.
